# Supplementary material for: Charge-tuneable biexciton complexes in monolayer WSe2
Source: PubMed Central journal article supplement (PMC6137137; doi:10.1038/s41467-018-05632-4), 2018-09-13
Supplement: 41467_2018_5632_MOESM1_ESM.pdf [file 41467_2018_5632_MOESM1_ESM.pdf]

## Supplementary Information for

### “Charge-tuneable biexciton complexes in monolayer WSe<sub>2</sub>”

Matteo Barbone<sup>1,2†</sup>, Alejandro R.-P. Montblanch<sup>1†</sup>, Dhiren M. Kara<sup>1</sup>, Carmen Palacios-Berraquero<sup>1</sup>, Alisson R. Cadore<sup>2</sup>, Domenico De Fazio<sup>2</sup>, Benjamin Pingault<sup>1</sup>, Elaheh Mostaani<sup>2</sup>, Han Li<sup>3</sup>, Bin Chen<sup>3</sup>, Kenji Watanabe<sup>4</sup>, Takashi Taniguchi<sup>4</sup>, Sefaattin Tongay<sup>3</sup>, Gang Wang<sup>2</sup>, Andrea C. Ferrari<sup>2\*</sup>, Mete Atatüre<sup>1\*</sup>

Affiliations:

<sup>1</sup>*Cavendish Laboratory, University of Cambridge, JJ Thomson Ave., Cambridge CB3 0HE, UK*

<sup>2</sup>*Cambridge Graphene Centre, University of Cambridge, Cambridge CB3 0FA, UK*

<sup>3</sup>*School for Engineering of Matter, Transport and Energy, Arizona State University, Tempe, AZ 85287, USA*

<sup>4</sup>*Advanced Materials Laboratory, National Institute for Materials Science, Tsukuba, Ibaraki 305-0034, Japan*

†these authors contributed equally to this work

### Supplementary Note 1: Growth of bulk WSe<sub>2</sub>

W and Se pellets with ultra-high purity (Puratronic 99.9999% or higher) are sealed in a quartz ampoule at 10<sup>-6</sup> Torr pressure. We adopt a two-step growth approach: in the first step, W and Se pellets are sealed at stoichiometric ratios (~500 mg total weight) in a quartz ampoule. The pressure is kept at 10<sup>-6</sup> Torr and the temperature at 1050 °C, slightly below the actual growth temperature of 1065 °C. Before sealing in vacuum, T~300 °C is applied to remove any residual molecules adsorbed on the precursors as well as on the quartz reactor walls. After sealing, the ampoule is at 1050 °C for 1 week to produce polycrystalline WSe<sub>2</sub> powders. The WSe<sub>2</sub> powders are checked with scanning electron microscope-energy dispersive spectroscopy (SEM-EDS) to determine the amount of Se vacancies. In the second step, ~5 mg extra Se is sealed with the WSe<sub>2</sub> powders in a quartz ampoule at 10<sup>-6</sup> Torr. The excess Se is added to help reduce potential Se vacancies. The sealed ampoule is then heated to 1090 °C over 3 days. The side without precursors is cooled by 25 °C to 1065 °C within an hour to create the thermodynamic flux to initiate the growth<sup>1</sup>. This process typically leads to crystalline WSe<sub>2</sub> flakes that are a few mm in size.

### Supplementary Note 2: Room-temperature optical characterization

The LMHs are characterized by Raman spectroscopy and PL using a Horiba LabRAM Evolution spectrometer equipped with a 100x objective (N.A. 0.6). Supplementary Figure 1 (a,b) plot the spectrum of bulk (red curve) and 1L-WSe<sub>2</sub> (magenta curve). In 1L-WSe<sub>2</sub>, the  $E_{2g}^1$  and  $A_{1g}$  modes<sup>2</sup> are merged in a single band at ~250 cm<sup>-1</sup> and the shear mode C, due to relative motion of atoms in adjacent planes, is not present<sup>3</sup>. Bulk WSe<sub>2</sub> shows split  $E_{2g}^1$  and  $A_{1g}$  modes at ~249 cm<sup>-1</sup> and at ~251 cm<sup>-1</sup> (Supplementary Reference 2). The C mode is detected at ~24 cm<sup>-1</sup> (Supplementary Reference 3). Supplementary Figure 1c,d plots the Raman spectra of the resulting layered material heterostructures, corresponding to Fig. 2 in the main text. The black curve in Supplementary Figure 1c,d is the spectrum of FLG on SiO<sub>2</sub>/Si with the characteristic G peak at ~1580 cm<sup>-1</sup> and the 2D band at ~2720 cm<sup>-1</sup> (Supplementary Reference 4). The green curve is the spectrum of hBN on FLG. The peak at ~1366 cm<sup>-1</sup> belongs to the  $E_{2g}$  mode of hBN<sup>5,6</sup>. The blue curve is the spectrum of ML-hBN/1L-WSe<sub>2</sub>/ML-hBN/FLG. This shows that all the features of the forming individual layers are preserved.

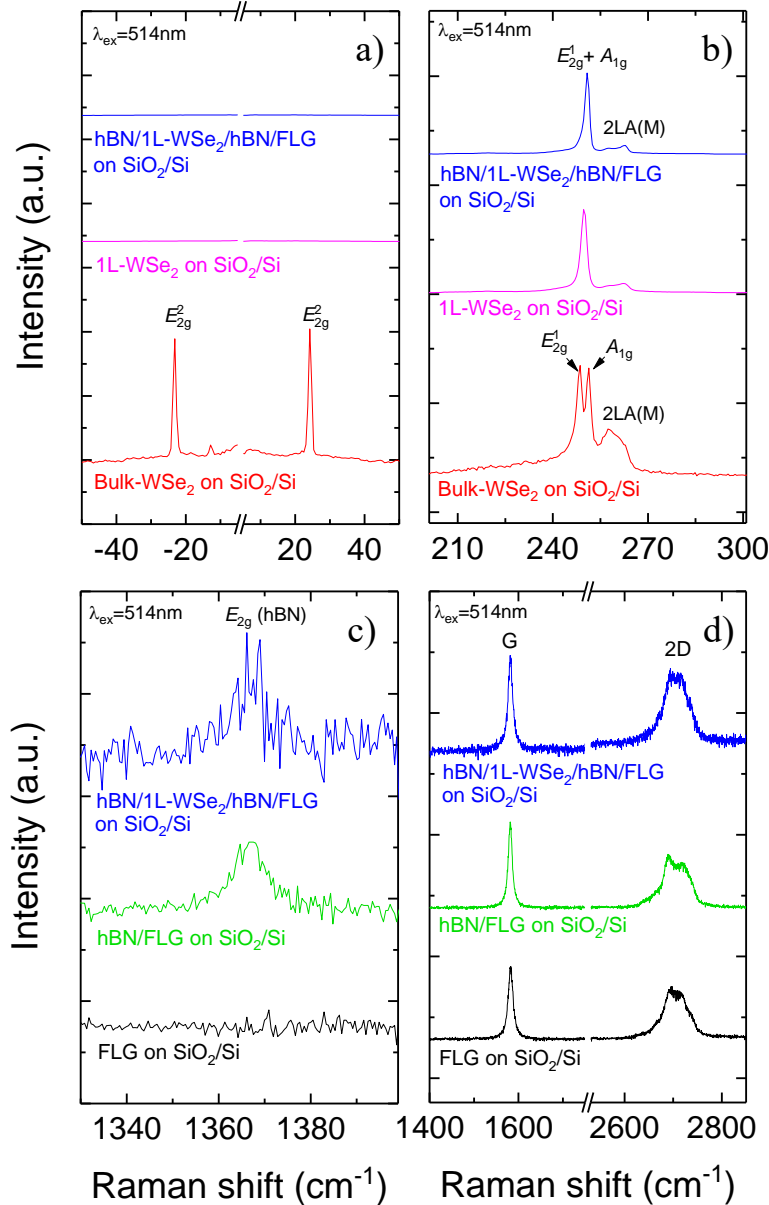

**Supplementary Figure 1: Raman spectra of layered material heterostructure.** **a** Low frequency and **b** high frequency Raman spectra of Bulk WSe<sub>2</sub> (red), 1L-WSe<sub>2</sub> (magenta) on Si/SiO<sub>2</sub> and ML-hBN/1L-WSe<sub>2</sub>/ML-hBN/FLG (blue). **c** E<sub>2g</sub> peak of hBN and D peak spectral regions and **d**) G and 2D peaks of FLG spectral region in FLG on SiO<sub>2</sub> (black); ML-hBN/FLG (green) on Si/SiO<sub>2</sub> and ML-hBN/1L-WSe<sub>2</sub>/ML-hBN/FLG (blue).

PL (Supplementary Figure 2) is collected to confirm the monolayer nature of the WSe<sub>2</sub> crystal. The peak at ~750 nm corresponds to the neutral X<sup>0</sup> exciton<sup>2</sup>. Supplementary Figure 2 compares the PL spectrum of 1L-WSe<sub>2</sub> on SiO<sub>2</sub> (magenta) and in the layered material heterostructure (blue) with that of bulk WSe<sub>2</sub> (red) keeping the same measurement conditions. The PL intensity

drastically decreases in bulk WSe<sub>2</sub> with respect to 1L-WSe<sub>2</sub> due to a direct-to-indirect bandgap transition<sup>7</sup>. The shape of the 1L-WSe<sub>2</sub> PL is preserved in the layered material heterostructure.

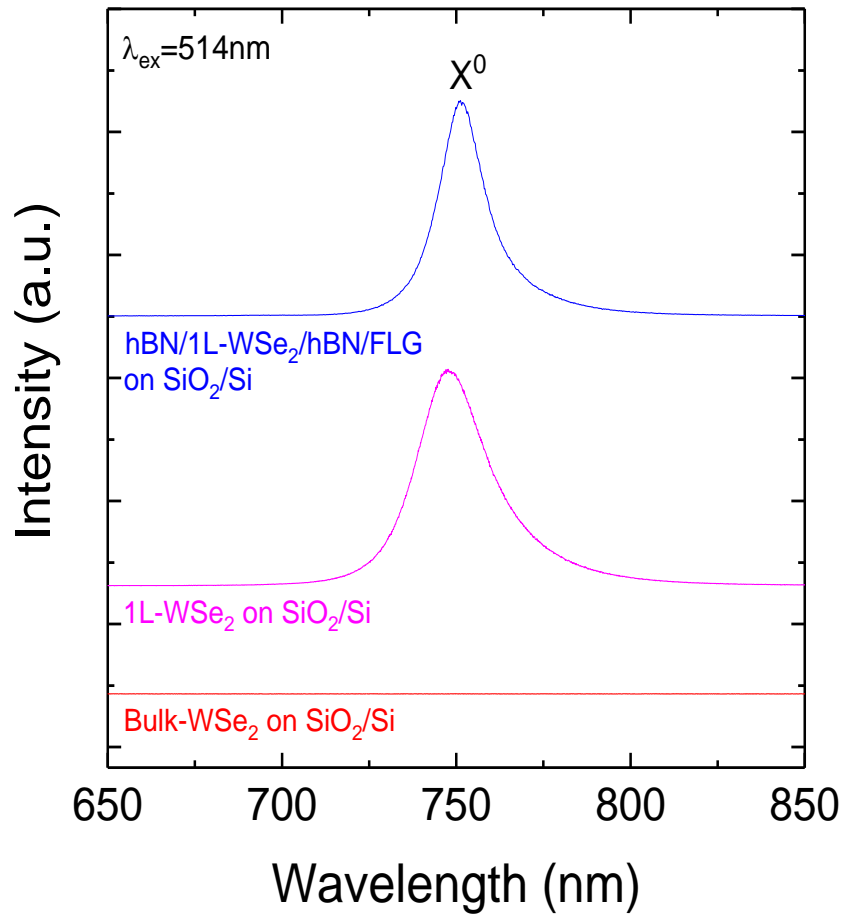

**Supplementary Figure 2: PL spectra at RT.** Blue curve shows the X<sup>0</sup> exciton at ~750 nm, which confirms the presence of 1L-WSe<sub>2</sub>. The red curve is the PL spectrum of bulk WSe<sub>2</sub> on SiO<sub>2</sub>/Si measured keeping the same laser power as that of 1L-WSe<sub>2</sub> (magenta curve). The blue curve is the PL spectrum of the layered material heterostructure.

### Supplementary Figure 3: Spectra of the fine structure of $XX^0$

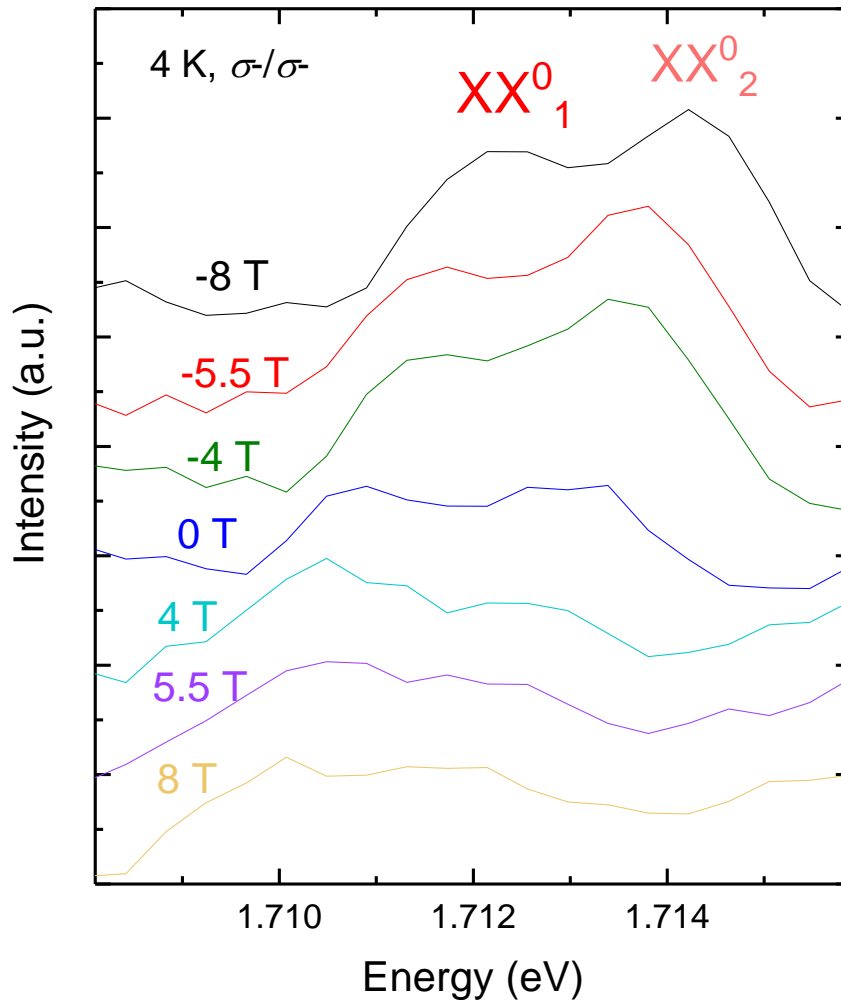

### Supplementary Figure 3: Line-cut spectra of $XX^0$ as function of applied magnetic field.

Spectra are taken at 4 K and different magnetic fields with a circular co-polarized scheme and  $\sigma$  helicity, showing the double peak formed by  $XX^0_1$  and  $XX^0_2$ , after linear background subtraction.

### Supplementary References:

1. Zhang X. *et al.*, Flux method growth of bulk MoS<sub>2</sub> single crystals and their application as a saturable absorber. *Cryst. Eng. Commun.* **17**, 4026-4032 (2015).
2. Tonndorf P. *et al.*, Photoluminescence emission and Raman response of monolayer MoS<sub>2</sub>, MoSe<sub>2</sub>, and WSe<sub>2</sub>. *Opt. Express* **21**, 4908 (2013).
3. Tan P. H. *et al.* The shear mode of multilayer graphene. *Nat. Mater.* **11**, 294 (2012).

4. Ferrari A. C. *et al.* Raman spectrum of graphene and graphene layers. *Phys. Rev. Lett.* **97**, 187401 (2006).
5. Reich S. *et al.* Resonant Raman scattering in cubic and hexagonal boron nitride. *Phys. Rev. B* **71**, 205201 (2005).
6. Arenal R. *et al.* Raman spectroscopy of single-wall boron nitride nanotubes. *Nano Lett.* **6**, 1812 (2006).
7. Mak K. F. *et al.* Atomically thin MoS<sub>2</sub>: a new direct-gap semiconductor. *Phys. Rev. Lett.* **105**, 136805 (2010).
